# Supplementary material for: Investigations into variations in local cationic environment in layered oxide series InGaO3(ZnO)m(m = 1–4)
Source: Royal Society of Chemistry journal article supplement (doi:10.1039/c3dt52011k), 2013-10-21
Supplement: c3dt52011k.pdf [file c3dt52011k.pdf]

# Investigations into variations in local cationic environment in layered oxide series $\text{InGaO}_3(\text{ZnO})_m$ ( $m = 1-4$ )

*Soumya B. Narendranath*<sup>a</sup>, *Ashok KumarYadav*<sup>b</sup>, *T.G. Ajithkumar*<sup>c</sup>, *Dibyendu Bhattacharyya*<sup>b</sup>,

*Shambhu Nath Jha*<sup>b</sup>, *Krishna Dey*<sup>d</sup>, *Thirumalaiswamy Raja*<sup>a</sup> and *R. Nandini Devi*<sup>a\*</sup>

<sup>a</sup>Catalysis and Inorganic Chemistry Division, CSIR-National Chemical Laboratory, Dr. Homi Bhabha Road, Pune 411008, India. <sup>b</sup>Applied Spectroscopy Division, Bhabha Atomic Research Centre, Trombay, Mumbai 400085, India. <sup>c</sup>Central NMR Facility, CSIR-National Chemical Laboratory, Dr. Homi Bhabha Road, Pune 411008, India. <sup>d</sup>Center of Biomedical Magnetic Resonance, Lucknow 226014, India.

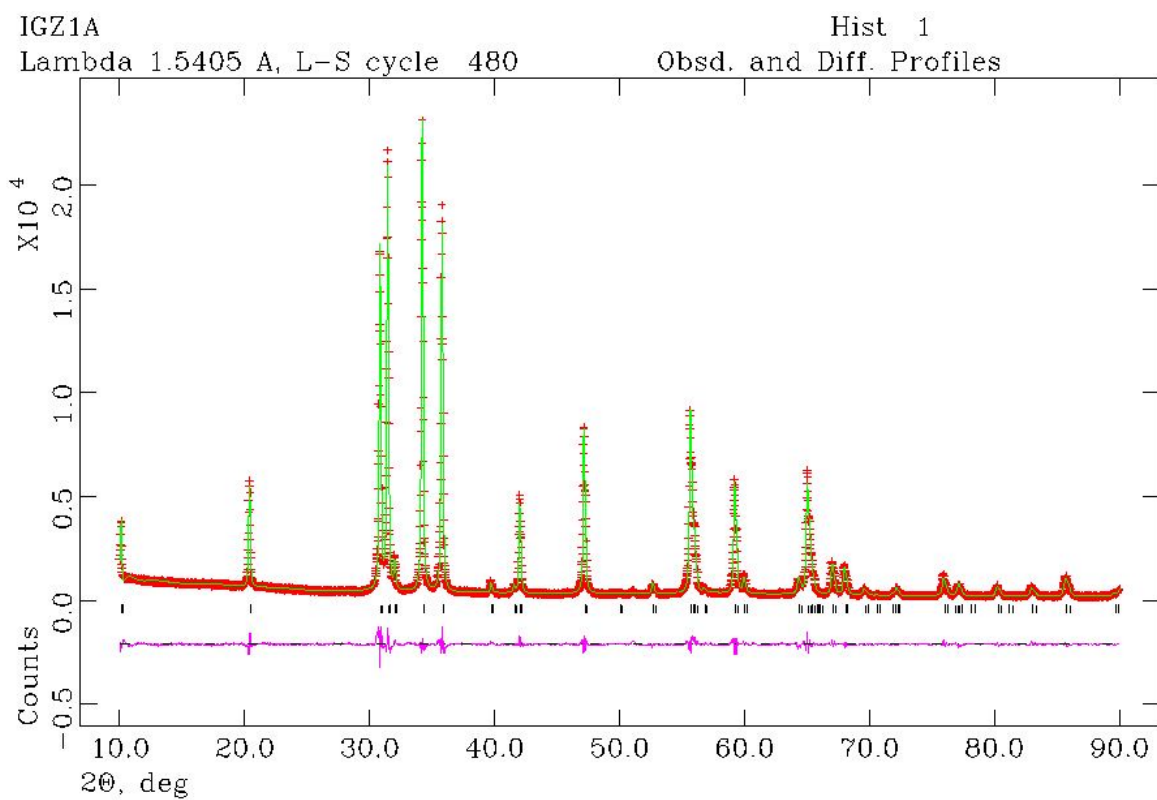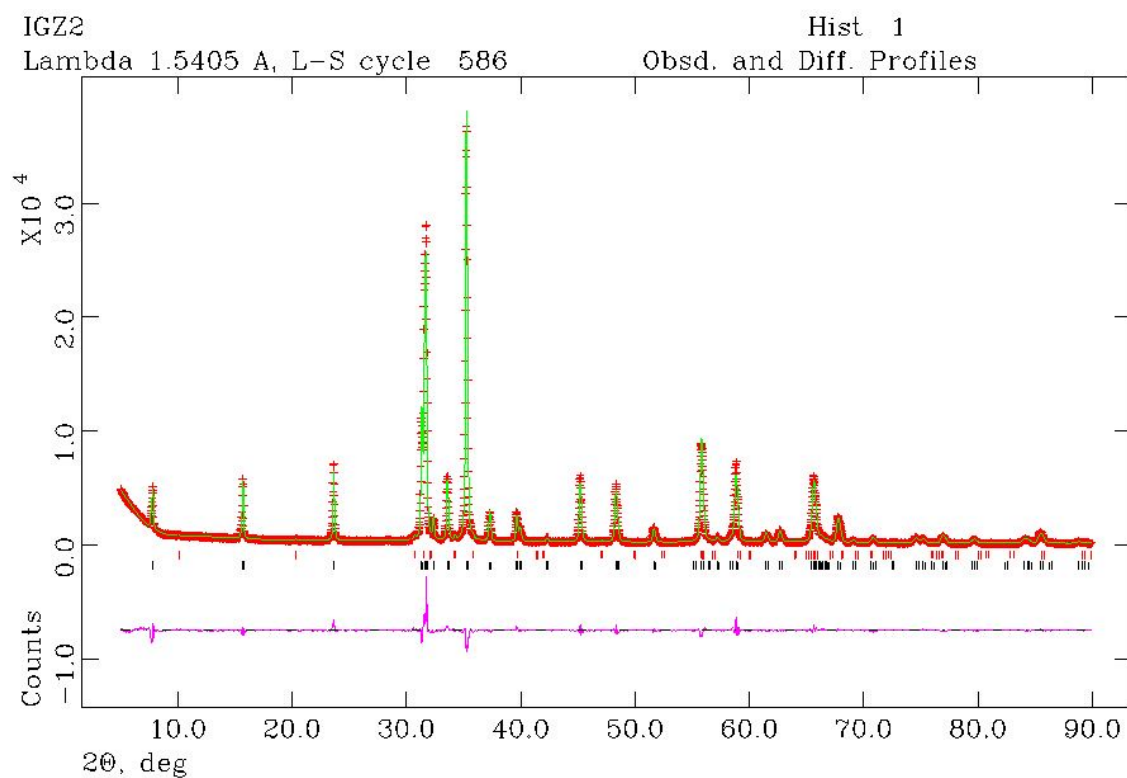

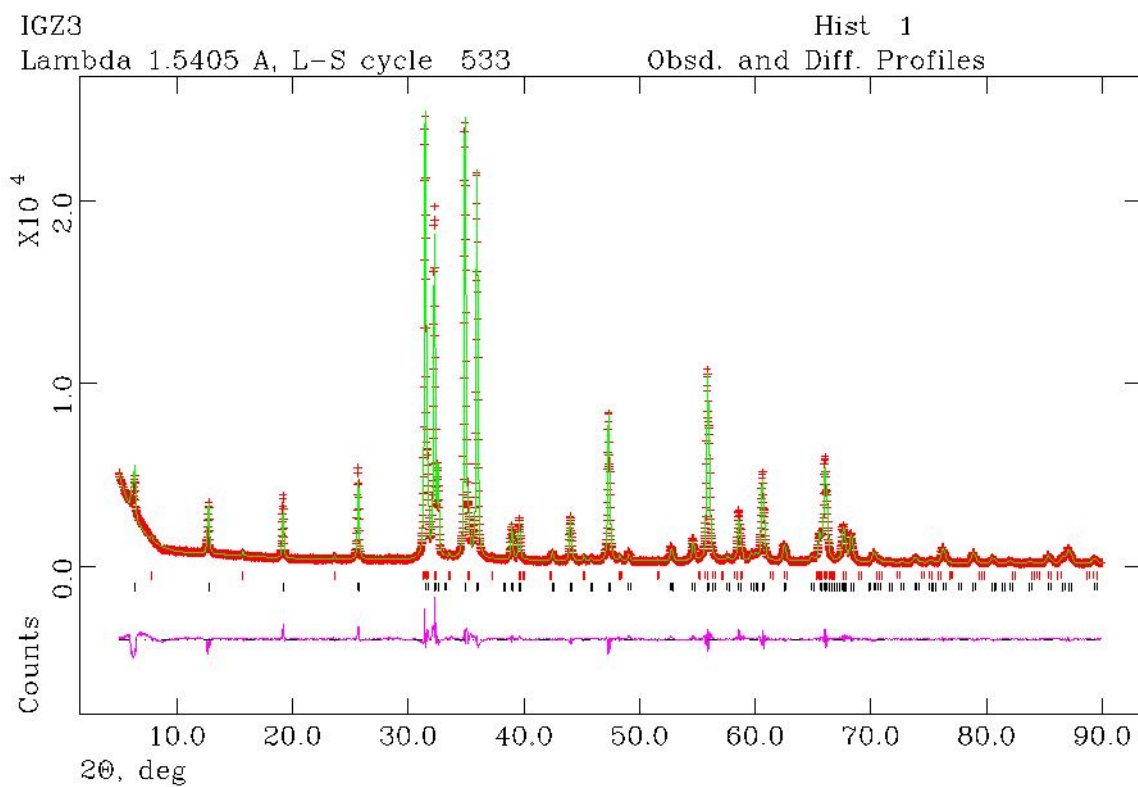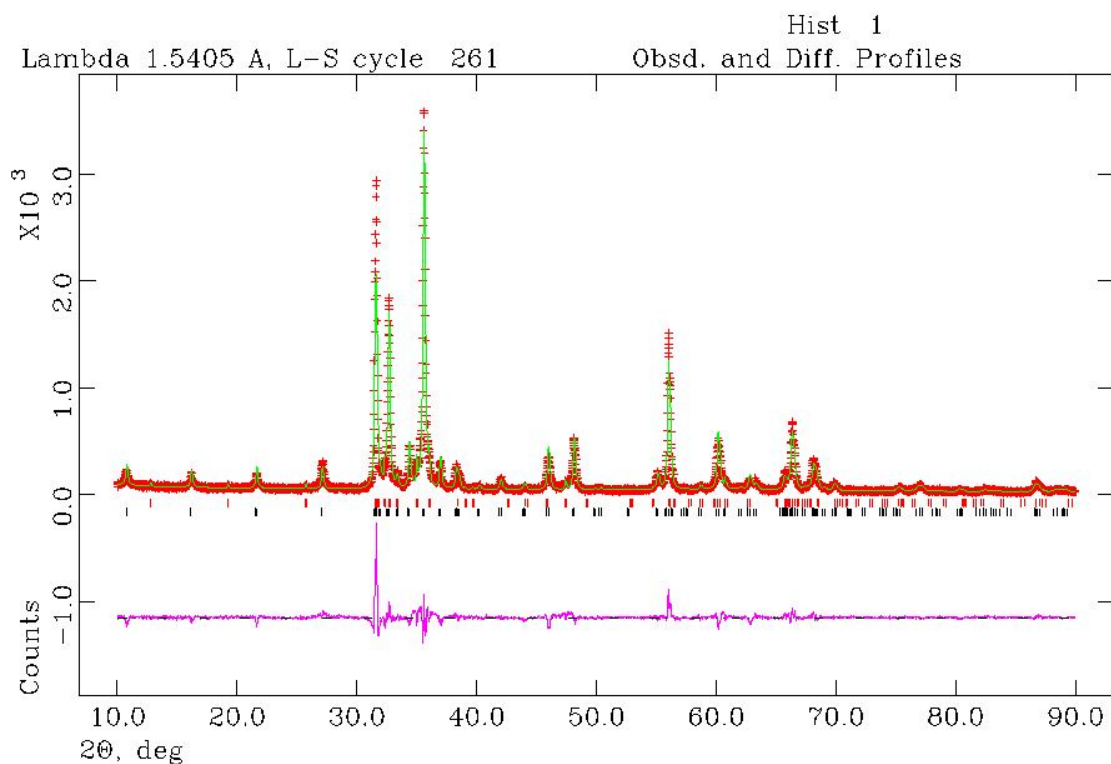

**Figure S1.** Rietveld refinement of the powder XRD pattern of  $\text{InGaO}_3(\text{ZnO})_m$  ( $m=1,2,3$  and 4) corresponding to IGZ1,2,3 and 4.

**Table S2.** The NMR fitting parameters for  $\text{InGaO}_3(\text{ZnO})_m$  ( $m=1,2,3$  and 4) corresponding to IGZ1,2,3 and 4.

|                           | IGZ1      |              |          |          |          | IGZ2      |              |          |          |          |
|---------------------------|-----------|--------------|----------|----------|----------|-----------|--------------|----------|----------|----------|
|                           | Td        | Intermediate | TBP      | Oct 1    | Oct 2    | Td        | Intermediate | TBP      | Oct 1    | Oct 2    |
| Model (DMFIT)             | —         | Q mas 1/2    | CzSimple | CzSimple | CzSimple | Q mas 1/2 | Q mas 1/2    | CzSimple | CzSimple | CzSimple |
| pos(ppm)                  | —         | 176.86       | 128.52   | 75.94    | 35.94    | 214.58    | 171.56       | 139.00   | 69.00    | 29.35    |
| Chemical Shift dist (ppm) | —         | —            | 6.00     | 4.00     | 4.00     | —         | —            | 8.00     | 3.00     | 3.00     |
| $C_Q$ (KHz)               | —         | 6950.12      | 6500.00  | 8025.36  | 8211.66  | 6084.53   | 6058.06      | 9000.00  | 8181.86  | 8314.07  |
| %                         | —         | 11.56        | 67.89    | 15.97    | 4.58     | 26.41     | 13.83        | 49.41    | 5.90     | 4.45     |
|                           | IGZ3      |              |          |          |          | IGZ4      |              |          |          |          |
|                           | Td        | Intermediate | TBP      | Oct 1    | Oct 2    | Td        | Intermediate | TBP      | Oct 1    | Oct 2    |
| Model (DMFIT)             | Q mas 1/2 | Q mas 1/2    | CzSimple | CzSimple | CzSimple | CzSimple  | —            | CzSimple | CzSimple | CzSimple |
| pos(ppm)                  | 223.00    | 173.80       | 139.00   | 70.76    | 21.42    | 211.00    | —            | 137.81   | 69.00    | 24.00    |
| Chemical Shift dist (ppm) | —         | —            | 1.00     | 3.00     | 3.00     | 5.00      | —            | 2.00     | 1.00     | 2.00     |
| $C_Q$ (KHz)               | 6350.00   | 6599.58      | 8900.00  | 8653.14  | 8403.67  | 5120.06   | —            | 8009.21  | 8983.16  | 8405.60  |
| %                         | 32.75     | 11.07        | 48.20    | 3.78     | 4.21     | 48.86     | —            | 38.94    | 6.56     | 5.64     |

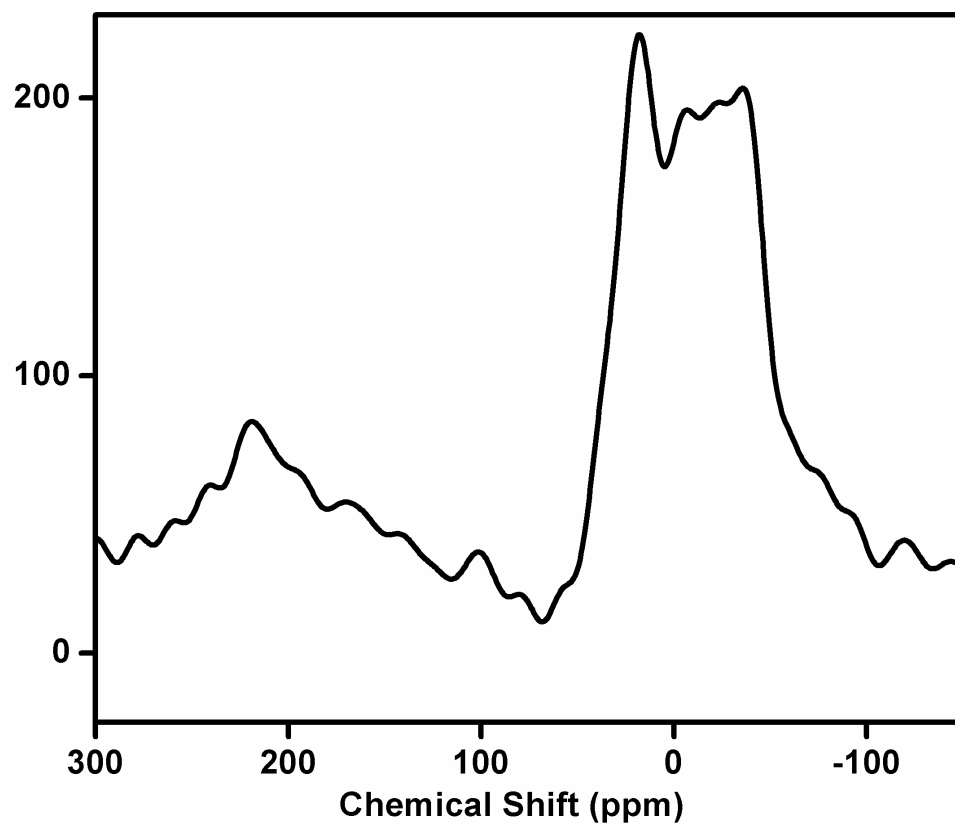

**Figure S3.**  $^{71}\text{Ga}$  Solid state NMR of  $\beta\text{-Ga}_2\text{O}_3$

**Table S4.** Local structural parameters for  $\text{InGaO}_3(\text{ZnO})_m$  ( $m=1,2,3$  and 4 named as IGZ1,2,3 and 4) evaluated by EXAFS measurements at Ga K-edge.

| Paths | Parameters | IGZ1          | IGZ2          | IGZ3          | IGZ4          |
|-------|------------|---------------|---------------|---------------|---------------|
| Ga-O  | R (Å)      | 1.86(±0.002)  | 1.85(±0.004)  | 1.84(±0.002)  | 1.85(±0.010)  |
|       | N          | 3.2(±0.012)   | 3.3(±0.03)    | 3.28(±0.015)  | 3.27(±0.058)  |
|       | $\sigma^2$ | 0.002(±0.003) | 0.002(±0.001) | 0.012(±0.004) | 0.002(±0.001) |
| Ga-O  | R (Å)      | 2.23(±0.006)  | 2.24(±0.029)  | 2.14(±0.009)  | 2.20(±0.020)  |
|       | N          | 1.85(±0.10)   | 0.94(±0.11)   | 0.8(±0.007)   | 1.42(±0.11)   |
|       | $\sigma^2$ | 0.002(±0.001) | 0.002(±0.001) | 0.002(±0.002) | 0.002(±0.001) |
| Ga-Zn | R (Å)      |               | 3.01(±0.013)  | 3.02(±0.006)  | 3.18(±0.01)   |
|       | N          |               | 6(±0.167)     | 3(±0.068)     | 6(±0.11)      |
|       | $\sigma^2$ |               | 0.008(±0.002) | 0.005(±0.001) | 0.003(±0.002) |
| Ga-In | R (Å)      | 3.47(±0.015)  |               |               |               |
|       | N          | 2.27(±0.116)  |               |               |               |
|       | $\sigma^2$ | 0.009(±0.003) |               |               |               |

**Table S5.** Local structural parameters for  $\text{InGaO}_3(\text{ZnO})_m$  ( $m=1,2,3$  and 4 named as IGZ1,2,3 and 4) evaluated by EXAFS measurements at Zn K-edge.

| Paths | Parameters | IGZ1                       | IGZ2          | IGZ3          | IGZ4          |
|-------|------------|----------------------------|---------------|---------------|---------------|
| Zn-O  | R (Å)      | 1.91(±0.003)               | 1.91(±0.003)  | 1.89(±0.005)  | 1.91(±0.007)  |
|       | N          | 3(±0.03)                   | 3.78(±0.024)  | 2.85(±0.039)  | 3.0(±0.08)    |
|       | $\sigma^2$ | 0.006(±0.001)              | 0.006(±0.001) | 0.006(±0.001) | 0.007(±0.001) |
| Zn-O  | R (Å)      | 2.34(±0.001)               | 2.38(±0.018)  | 2.24(±0.015)  | 2.21(±0.001)  |
|       | N          | 2(±0.09)                   | 0.91(±0.15)   | 1.37(±0.17)   | 0.96(±0.11)   |
|       | $\sigma^2$ | 0.009(±0.002)              | 0.005(±0.003) | 0.01(±0.003)  | 0.003(±0.001) |
| Zn-Ga | R (Å)      | 3.11(±0.006)<br>(Zn-Zn/Ga) | 3.18(±0.012)  | 3.07(±0.015)  | 3.09(±0.016)  |
|       | N          | 3.17(±0.011)               | 3(±0.16)      | 3(±0.13)      | 3(±0.15)      |
|       | $\sigma^2$ | 0.003(±0.001)              | 0.009(±0.002) | 0.008(±0.001) | 0.003(±0.002) |
| Zn-Zn | R (Å)      | 3.29(±0.005)               | 3.18(±0.008)  | 3.24(±0.007)  | 3.26(±0.016)  |
|       | N          | 6(±0.06)                   | 4.48(±0.076)  | 6(±0.084)     | 6(±0.11)      |
|       | $\sigma^2$ | 0.006(±0.001)              | 0.009(±0.001) | 0.009(±0.001) | 0.006(±0.002) |
| Zn-In | R (Å)      | 3.44(±0.012)               | 3.52(±0.016)  | 3.65(±0.028)  | 4.11(±0.011)  |
|       | N          | 2.68(±0.11)                | 2.21(±0.016)  | 2.4(±0.028)   | 3(±0.011)     |
|       | $\sigma^2$ | 0.009(±0.002)              | 0.008(±0.003) | 0.01(±0.009)  | 0.015(±0.002) |

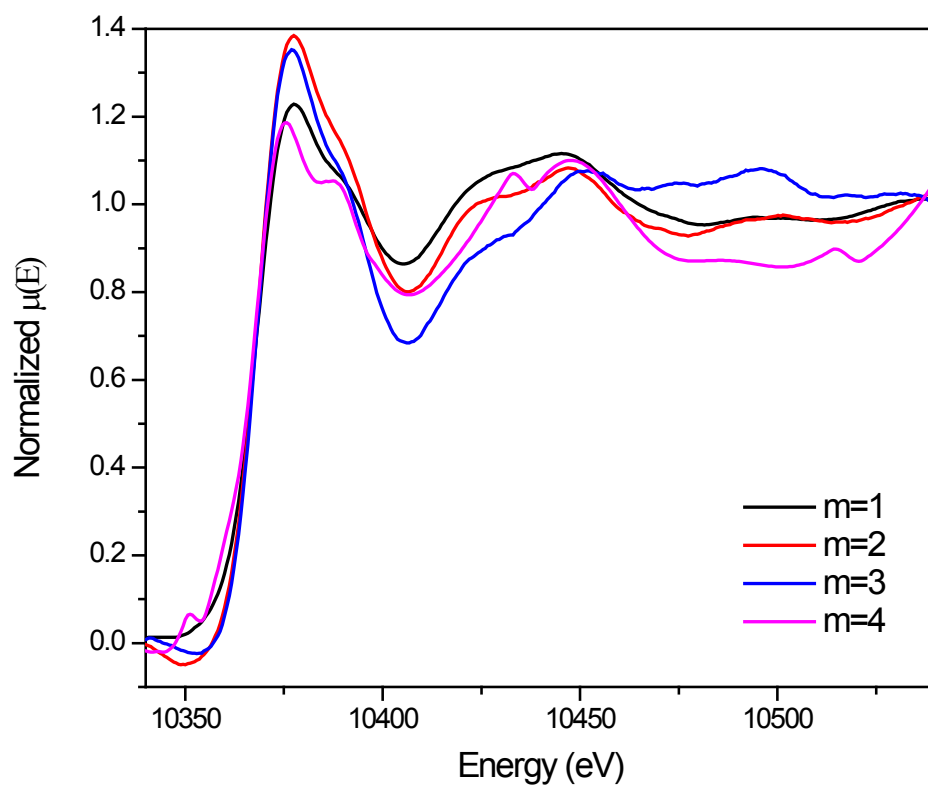

**Figure S6.** Normalised EXAFS spectra for  $\text{InGaO}_3(\text{ZnO})_m$  for  $m=1,2,3$  and 4 at Ga K-edge.



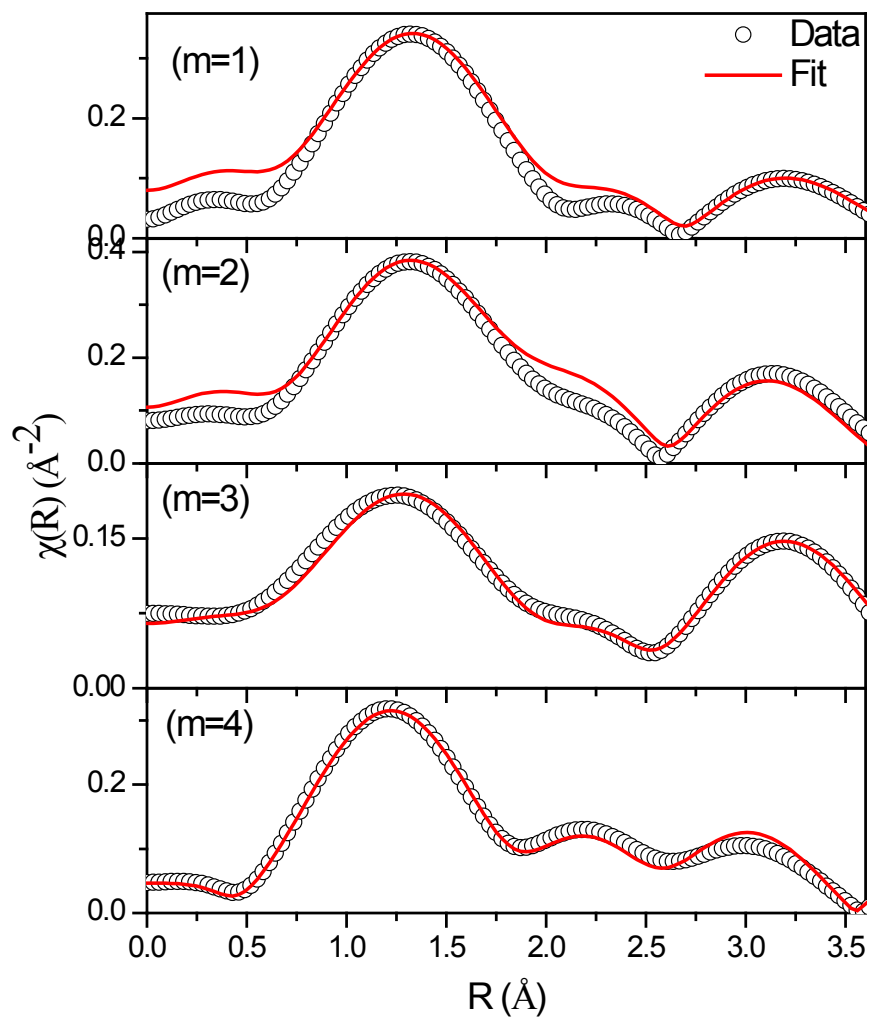

**Figure S7.** Fourier transformed EXAFS spectra of  $\text{InGaO}_3(\text{ZnO})_m$  for  $m=1,2,3$  and 4 at Ga K-edge (Scatter points) and theoretical fit (Solid line).
